# Supplementary material for: Electrospun conductive polyaniline–polylactic acid composite nanofibers as counter electrodes for rigid and flexible dye-sensitized solar cells
Source: Royal Society of Chemistry journal article supplement (doi:10.1039/c1ra00618e), 2011-11-16
Supplement: c1ra00618e.pdf [file c1ra00618e.pdf]

# Supporting Information

## Electrospun conductive polyaniline–polylactic acid composite nanofibers as counter electrodes for rigid and flexible dye-sensitized solar cells

Shengjie Peng,<sup>\*,ab</sup> Peining Zhu,<sup>c</sup> Yongzhi Wu,<sup>d</sup> Subodh G. Mhaisalkar<sup>a</sup> and Seeram Ramakrishna<sup>\*,ef</sup>

5

Table S1 Band assignments of PANI–PLA and PANI–CSA–PLA composite films.

| Wavenumber (cm <sup>-1</sup> ) | Assignment            |
|--------------------------------|-----------------------|
| 1751                           | –C=O carbonyl stretch |
| 1588,1480                      | C=C stretch           |
| 1182                           | C–N stretch           |
| 1455                           | –CH <sub>3</sub> bend |
| 866                            | C–H stretch           |
| 1475,1092,590                  | doping                |

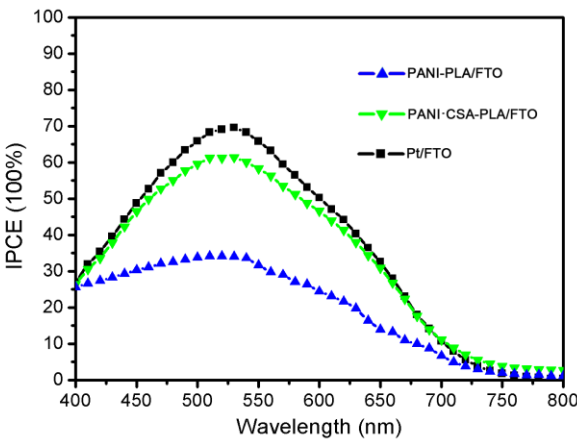

10 **Fig. S1** IPCE curves of the DSCs fabricated with PANI–PLA, PANI–CSA–PLA, and Pt counter electrodes.
